# Supplementary material for: Impact of heat and a rest-shade-hydration intervention program on productivity of piece-paid industrial agricultural workers at risk of chronic kidney disease of nontraditional origin
Source: PubMed Central journal article supplement (PMC11033565; doi:10.1093/annweh/wxae007), 2024-02-17
Supplement: wxae007_suppl_supplementary_material.pdf [file wxae007_suppl_supplementary_material.pdf]

# Impact of heat and a rest-shade-hydration intervention program on productivity of piece-paid industrial agricultural workers at risk of chronic kidney disease of non-traditional origin

Erik Hansson <sup>1,2</sup>, Kristina Jakobsson <sup>1,2,3</sup>, Jason Glaser <sup>1</sup>, Catharina Wesseling <sup>1,4</sup>, Denis Chavarría <sup>5</sup>, Rebekah A. I. Lucas <sup>1,6</sup>, Heath Prince <sup>1,7</sup> David H. Wegman <sup>1,8</sup>

<sup>1</sup> La Isla Network, Washington, District of Columbia, USA

<sup>2</sup> School of Public Health, University of Gothenburg Sahlgrenska Academy, Gothenburg, Sweden

<sup>3</sup> Occupational and Environmental Medicine, Sahlgrenska University Hospital, Gothenburg, Sweden

<sup>4</sup> Institute of Environmental Medicine, Unit of Occupational Medicine, Karolinska Institute, Stockholm, Sweden

<sup>5</sup> Occupational Health Management, Ingenio San Antonio/Nicaragua Sugar Estates Limited, Chichigalpa, Nicaragua

<sup>6</sup> School of Sport, Exercise and Rehabilitation Sciences, University of Birmingham, Birmingham, UK

<sup>7</sup> LBJ School of Public Affairs, University of Texas at Austin

<sup>8</sup> University of Massachusetts Lowell, Lowell, Massachusetts, USA

Supplement figures and tables

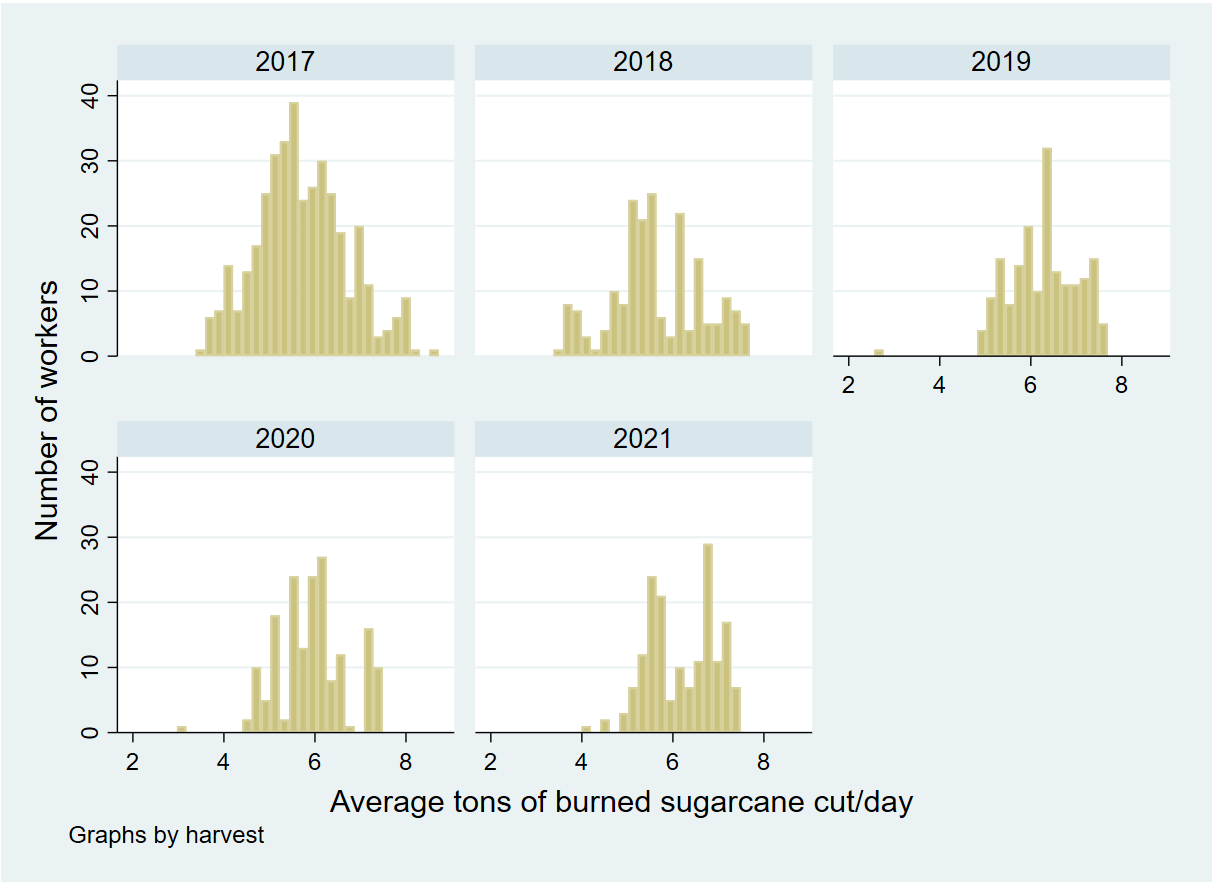

Supplement figure 1: Average tons of burned sugarcane cut per day, for each of the harvests 2017-2018, to 2021-2022.

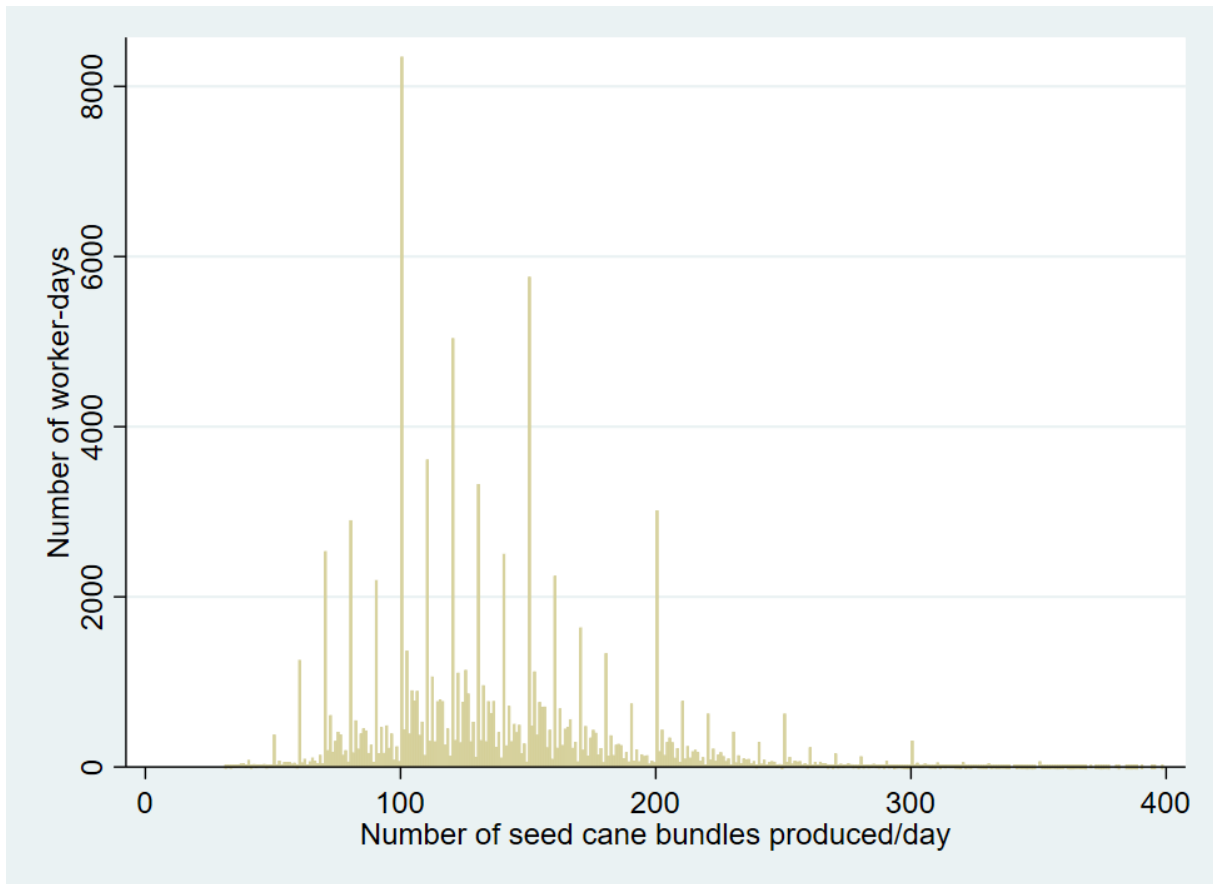

Supplement Figure 2A: Number of seed sugarcane bundles produced per day. The preference towards producing or recording numbers ending with zero can be seen.

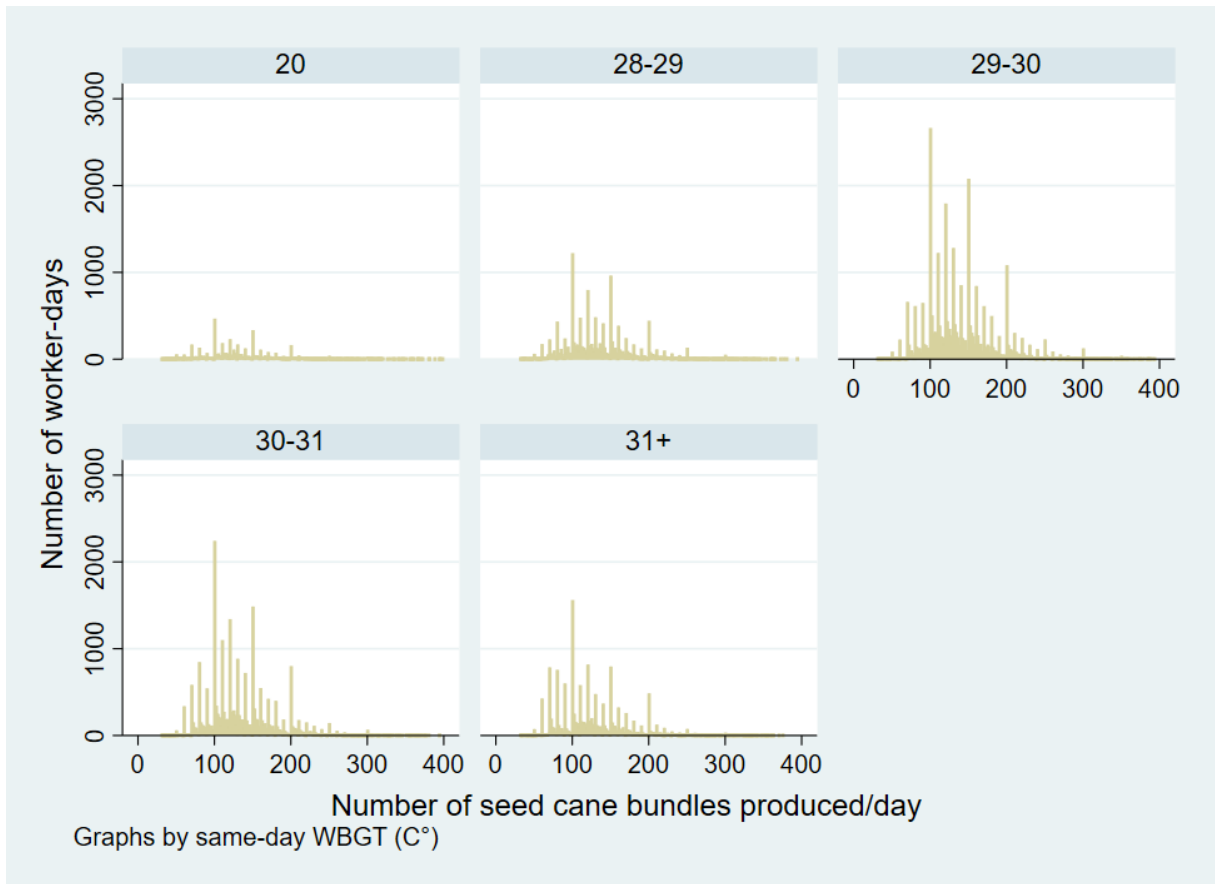

Supplement Figure 2B: Number of seed sugarcane bundles produced per day, by same-day heat

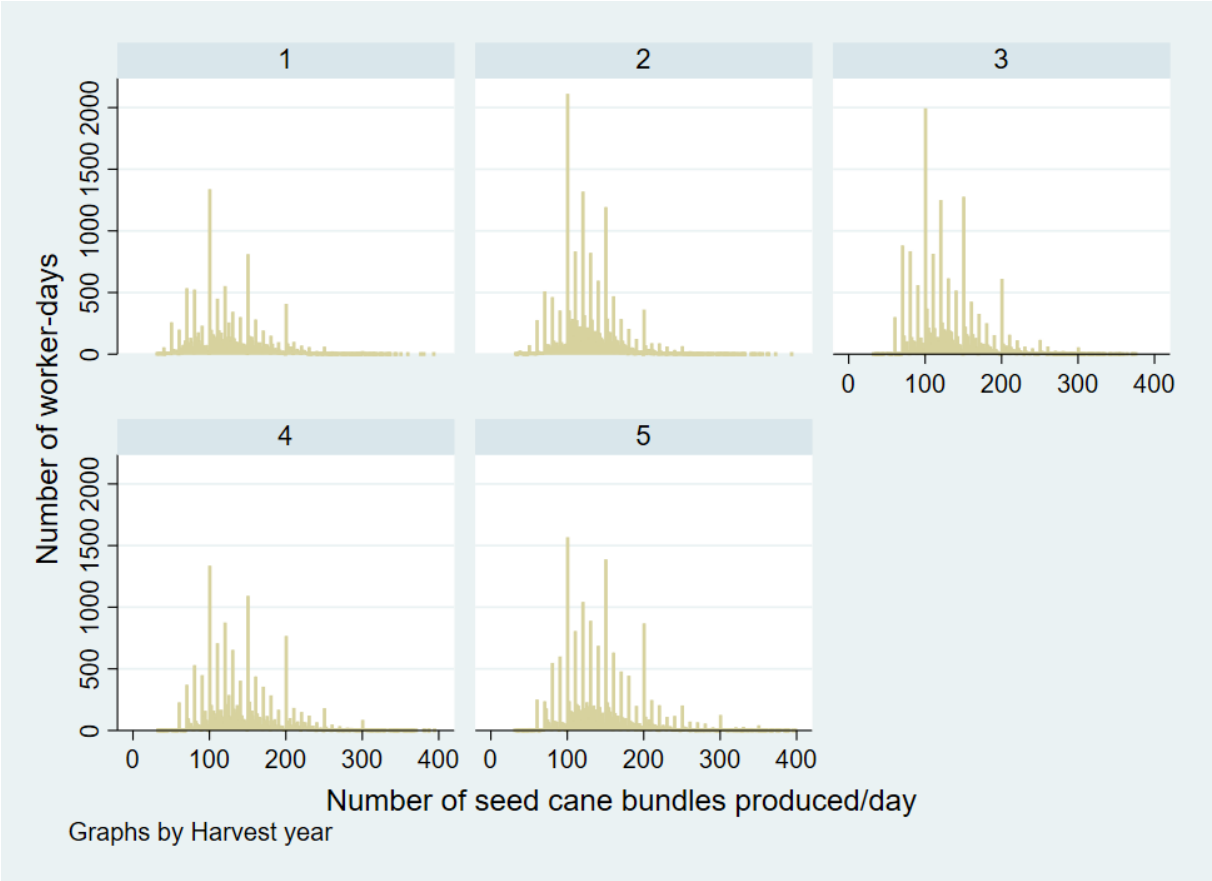

Supplement Figure 2C: Number of seed sugarcane bundles produced per day, by harvest

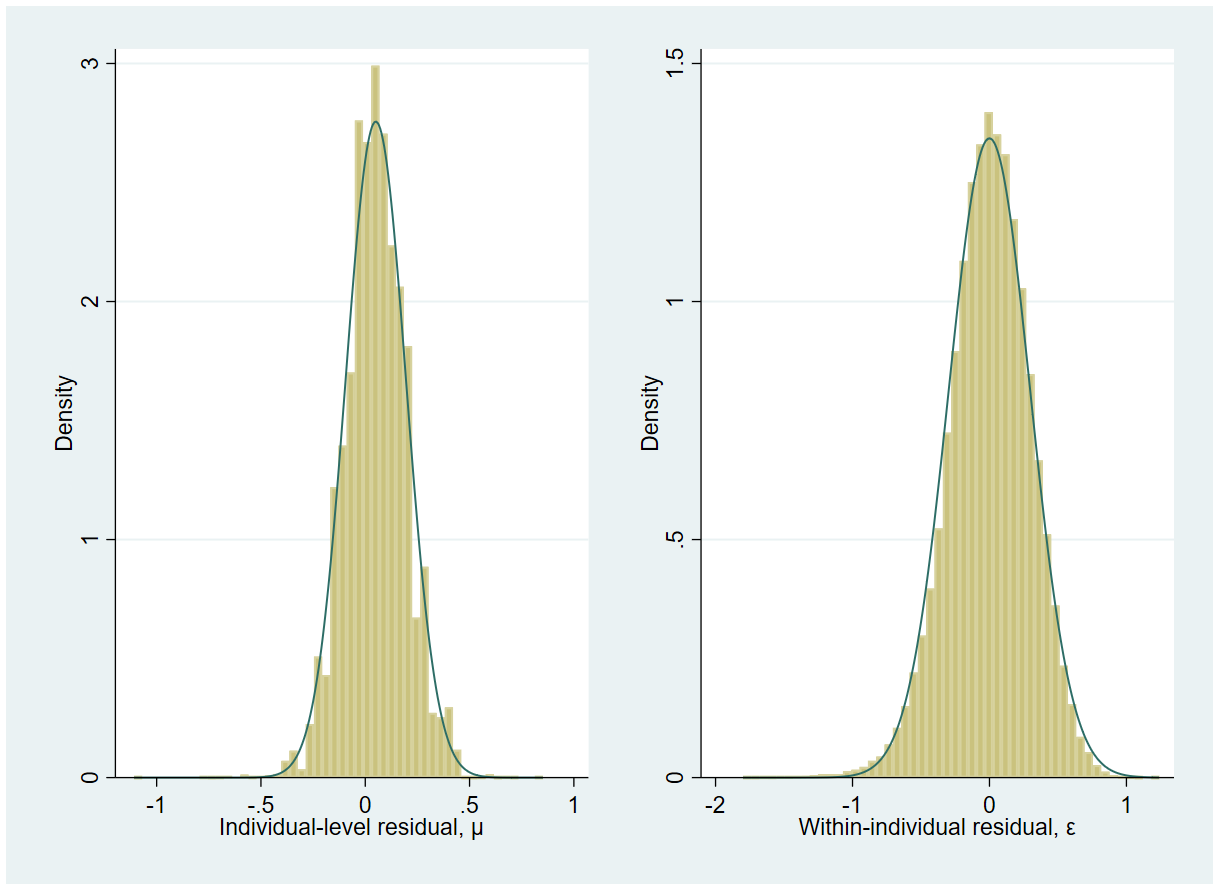

Supplement figure 3. Distribution of residuals for the seed sugarcane bundle productivity at individual and within-individual level.

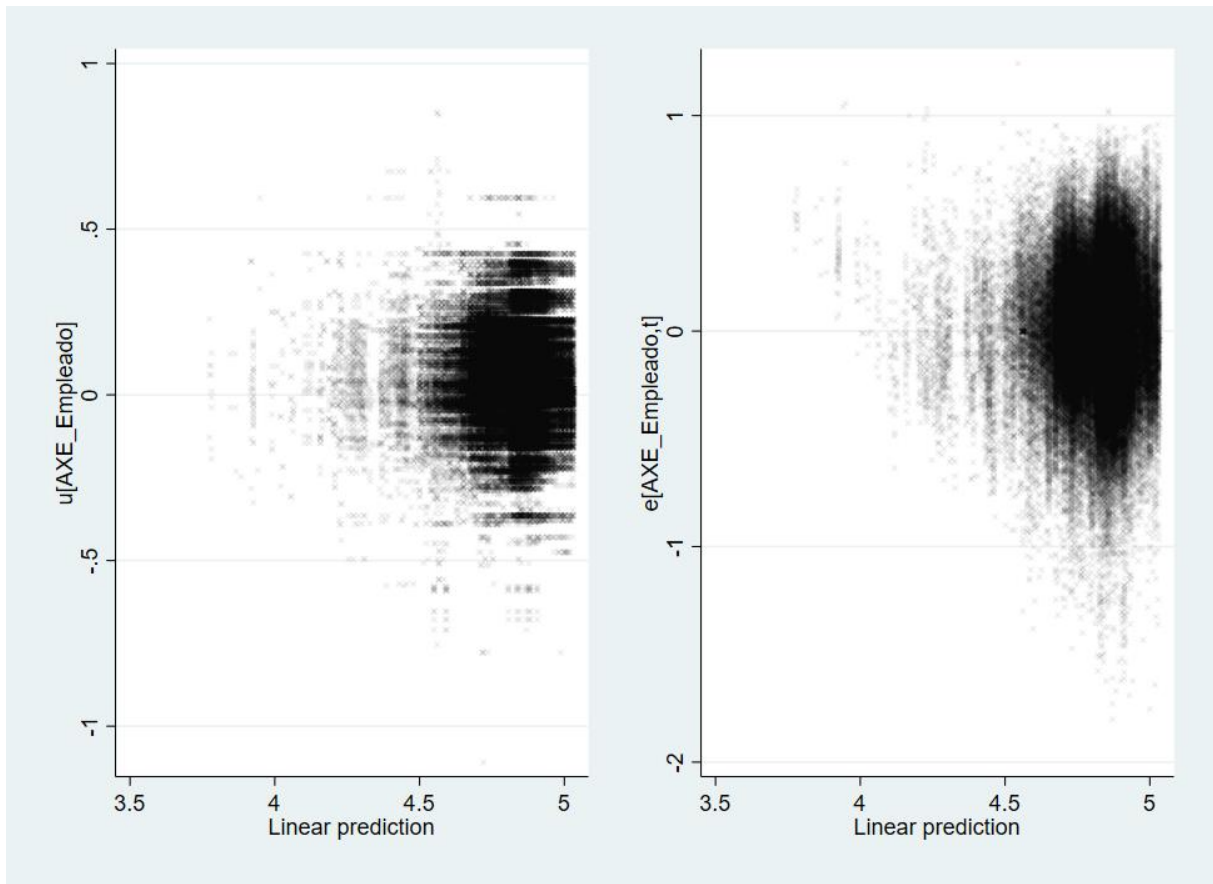

Supplement figure 4: Association between residuals for the seed sugarcane bundle productivity at individual and within-individual level and model predicted seed sugarcane productivity.

Supplement Table 1: Regression model estimates for main reported model and models allowing for violations of specific model assumptions.

|                                                          | Main model    | Allowing for heteroscedasticity | Allowing for autocorrelation within individuals |
|----------------------------------------------------------|---------------|---------------------------------|-------------------------------------------------|
| <b>Harvest year</b>                                      |               |                                 |                                                 |
| 1. 2017-18                                               | Reference     | Reference                       | Reference                                       |
| 2. 2018-19                                               | 6 (5,7)       | 6 (4,7)                         | 5 (4,6)                                         |
| 3. 2019-20                                               | 8 (7,9)       | 8 (6,10)                        | 7 (6,8)                                         |
| 4. 2020-21                                               | 12 (11,13)    | 12 (10,14)                      | 11 (10,13)                                      |
| 5. 2021-22                                               | 19 (18,20)    | 19 (17,22)                      | 17 (16,19)                                      |
| <b>Heat in the preceding day (WBGT)</b>                  |               |                                 |                                                 |
| Sunday                                                   | -1 (-2,0)     | -1 (-2,0)                       | 0 (-1,1)                                        |
| <28                                                      | Reference     | Reference                       | Reference                                       |
| 28-29                                                    | 0 (-1,1)      | 0 (-1,1)                        | 0 (-1,1)                                        |
| 29-30                                                    | -3 (-4,-2)    | -3 (-4,-2)                      | -2 (-3,-1)                                      |
| 30-31                                                    | -4 (-5,-3)    | -4 (-5,-3)                      | -3 (-4,-2)                                      |
| 31+                                                      | -7 (-8,-6)    | -7 (-8,-6)                      | -5 (-6,-4)                                      |
| <b>Same-day heat (WBGT)</b>                              |               |                                 |                                                 |
| <28                                                      | Reference     | Reference                       | Reference                                       |
| 28-29                                                    | -3 (-3,-2)    | -3 (-4,-1)                      | -2 (-3,-1)                                      |
| 29-30                                                    | -3 (-4,-2)    | -3 (-4,-2)                      | -1 (-2,-1)                                      |
| 30-31                                                    | -5 (-6,-4)    | -5 (-6,-4)                      | -3 (-4,-2)                                      |
| 31+                                                      | -8 (-9,-7)    | -8 (-9,-7)                      | -7 (-8,-6)                                      |
| <b>Sex</b>                                               |               |                                 |                                                 |
| Men                                                      | Reference     | Reference                       | Reference                                       |
| Women                                                    | -13 (-17,-10) | -13 (-16,-10)                   | -13 (-16,-10)                                   |
| <b>Time worked previously in the same harvest (days)</b> |               |                                 |                                                 |
| 0-6                                                      | -25 (-26,-23) | -25 (-26,-23)                   | -23 (-24,-21)                                   |
| 7-13                                                     | -2 (-3,-1)    | -2 (-3,-0)                      | -3 (-5,-1)                                      |
| >13                                                      | Reference     | Reference                       | Reference                                       |
| <b>Month</b>                                             |               |                                 |                                                 |
| November                                                 | -44 (-45,-42) | -44 (-46,-41)                   | -41 (-43,-40)                                   |
| December                                                 | -12 (-13,-11) | -12 (-13,-11)                   | -13 (-14,-12)                                   |
| January                                                  | Reference     | Reference                       | Reference                                       |
| February                                                 | -1 (-2,-1)    | -1 (-2,0)                       | -1 (-2,0)                                       |
| March                                                    | -5 (-6,-5)    | -5 (-6,-5)                      | -5 (-6,-4)                                      |
| April                                                    | -2 (-2,-1)    | -2 (-3,-1)                      | -2 (-3,-1)                                      |
| May                                                      | -5 (-6,-3)    | -5 (-7,-3)                      | -6 (-8,-4)                                      |
| <b>Age (years)</b>                                       |               |                                 |                                                 |
| 18-29                                                    | Reference     | Reference                       | Reference                                       |
| 30-44                                                    | -1 (-2,0)     | -1 (-3,1)                       | 0 (-2,1)                                        |
| >45                                                      | -6 (-9,-2)    | -6 (-12,0)                      | -7 (-12,-2)                                     |
| Intercept                                                | 131 (128,133) | 131 (127,134)                   | 130 (127,132)                                   |
| Sigma $\mu$                                              | 19 (18,20)    | 19 (18,21)                      | 15                                              |
| Sigma $\epsilon$                                         | 35 (35,35)    | 35 (34,35)                      | 33                                              |



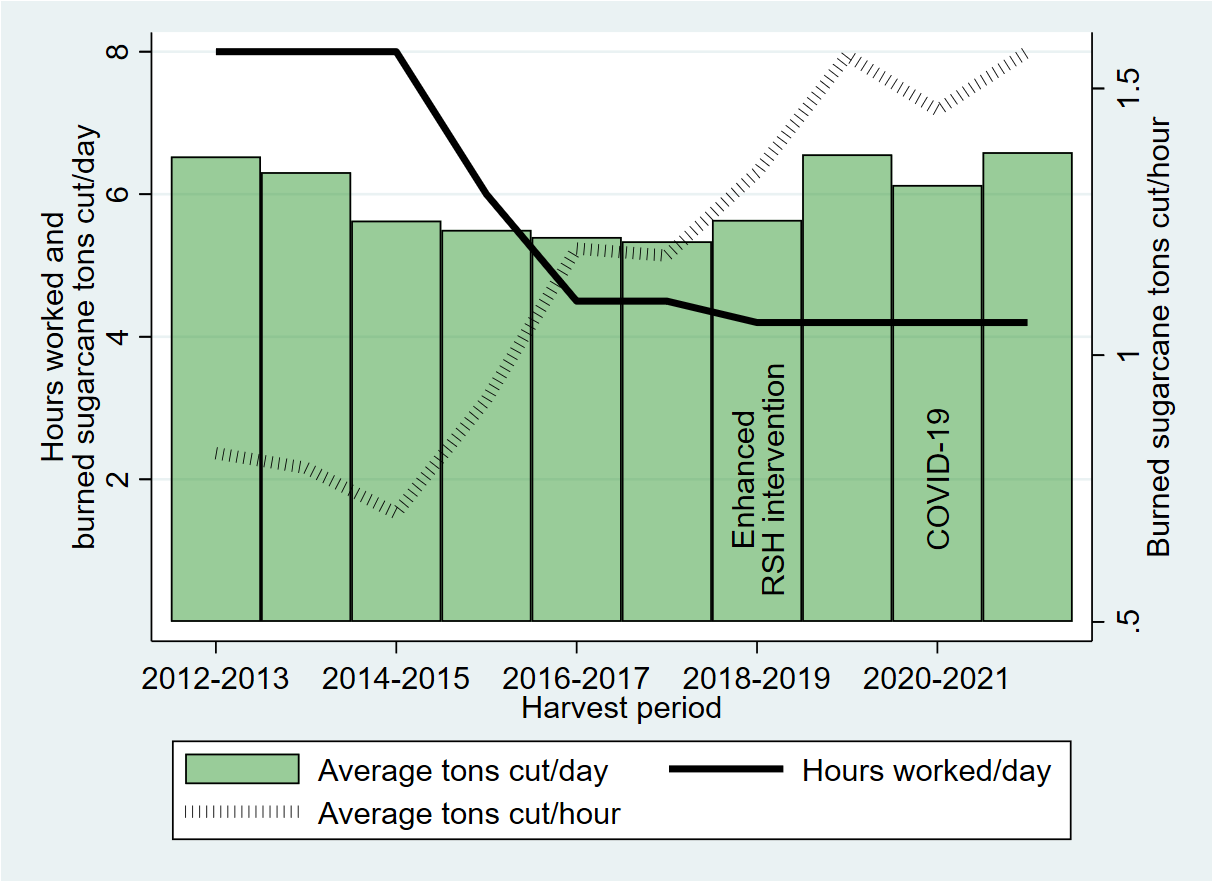

Supplement figure 5. Hours worked and average tons of burned sugarcane cut by ISA workers from 2012-2022.
